# Supplementary material for: Validation and analysis of the geographical origin of Angelica sinensis (Oliv.) Diels using multi-element and stable isotopes
Source: PeerJ. 2021 Aug 6;9:e11928. doi: 10.7717/peerj.11928 (PMC8351574; doi:10.7717/peerj.11928)
Supplement: Supplemental Information 1 [file peerj-09-11928-s001.xlsx]

## Sheet: Sheet1
Site	Longitude	Latitude
LX	1033100	352002
LX	1033100	352102
LX	1034200	350306
LX	1028982	354606
LX	1028995	355788
GN	3044	4320
GN	2732	4020
GN	3841	4344
GN	2245	3941
GN	4127	3956
GN	1611	4204
GN	1440	4058
DX	103°56′25″	34°38′05″
DX	104°11′48″	34°28′07″
DX	1042255	343223
DX	1.04003e+06	343226
DX	1.04041e+06	342806
DX	1035249	343951
DX	1040634	343704
DX	1.03504e+06	342850
DX	1042526	342500
DX	1.04042e+06	341802
DX	1.03572e+06	343914
DX	103°57′48.74〃	34°34′30.47〃
DX	103°51′26.42〃	34°23′12.40〃
