# Supplementary material for: Validation and analysis of the geographical origin of Angelica sinensis (Oliv.) Diels using multi-element and stable isotopes
Source: PeerJ. 2021 Aug 6;9:e11928. doi: 10.7717/peerj.11928 (PMC8351574; doi:10.7717/peerj.11928)
Supplement: Supplemental Information 5 [file peerj-09-11928-s005.xlsx]

## Sheet: Additional
id	group	K(mg/kg)	Mg(mg/kg)	Zn(mg/kg)	Cu(mg/kg)	Ca(mg/kg)	Mn(mg/kg)	Cr(mg/kg)	Al(mg/kg)	Zn/Mn	Cu/Cr	Ca/Al	δ13C(‰)	δ15N(‰)	δ18O(‰)
1	LX	4245.27	663.279	3.40995	1.61898	791.768	5.6354	1.07973	124.182	0.605094	1.49942	6.37588	-24.0256	-0.9386	25.3051
2	LX	4321.84	719.973	7.10708	2.32463	975.517	7.86154	2.72756	245.791	0.904031	0.852274	3.96888	-24.0566	1.6944	23.8802
3	LX	2806.75	638.965	7.01407	2.45215	646.473	5.01075	1.11777	95.5573	1.39981	2.19378	6.76529	-24.5193	-0.2886	25.275
4	LX	3131.31	423.823	5.06008	1.76108	511.783	5.22949	1.14264	179.278	0.967605	1.54123	2.85469	-24.5213	0.8424	24.7734
5	LX	3306.18	927.623	7.28351	2.10136	922.692	6.89158	1.88405	287.768	1.05687	1.11534	3.20638	-24.8338	-2.0826	24.0326
6	GN	5212.96	621.472	4.70244	1.55857	767.836	4.48747	0.511235	66.3805	1.04791	3.04865	11.5672	-23.1573	1.9095	26.5673
7	GN	7311.15	706.103	5.62216	1.83775	909.622	7.25136	1.01823	80.408	0.775325	1.80485	11.3126	-23.7351	5.5345	27.1001
8	GN	6082.31	838.146	4.97756	1.14701	737.291	4.73071	0.534985	84.9407	1.05218	2.14401	8.68007	-23.609	3.3915	26.5588
9	GN	6410.26	704.996	4.22541	1.02262	855.37	5.32441	0.670002	118.523	0.793592	1.5263	7.21694	-22.985	3.6295	26.4167
10	GN	5693.6	603.98	5.40978	1.55731	723.133	4.70286	0.634227	119.786	1.15032	2.45544	6.03686	-23.9425	3.4125	26.0364
11	GN	6809.07	748.977	4.64777	2.13669	906.654	6.24989	1.27294	147.936	0.743656	1.67855	6.12869	-23.64	2.5435	26.2332
12	GN	7255.28	602.666	4.27576	1.48862	889.086	4.74183	0.518844	67.8553	0.901711	2.86911	13.1027	-24.1168	5.5175	25.7673
13	DX	4298.62	769.63	5.70354	1.63292	915.269	5.38389	1.02947	111.502	1.05937	1.58617	8.20853	-23.9678	1.084	24.4849
14	DX	8007.84	874.647	6.26428	1.93896	992.865	4.68392	0.607337	72.8095	1.3374	3.19256	13.6365	-22.7528	1.773	23.7823
15	DX	4474.3	772.74	4.35532	1.5855	925.307	3.98539	0.500834	81.6317	1.09282	3.16572	11.3351	-23.0398	0.444	24.5011
16	DX	7487.72	780.409	4.11417	1.52245	991.593	4.25603	0.906606	85.0923	0.966669	1.67928	11.6532	-24.0938	5.573	24.1317
17	DX	4169.25	591.882	5.13049	1.8578	730.901	5.51679	0.896914	94.7985	0.929978	2.07132	7.71005	-24.0468	1.52	23.8587
18	DX	6018.62	704.537	6.80906	2.54706	964.992	6.42004	2.27502	118.964	1.06059	1.11957	8.11165	-23.6298	3.537	23.4368
19	DX	4929.84	510.996	4.81395	1.29874	653.968	4.02448	0.735262	87.0261	1.19617	1.76637	7.51461	-24.1318	1.5	24.3818
20	DX	4549.13	753.45	7.69874	2.0771	732.858	5.35541	0.976205	141.07	1.43756	2.12773	5.19501	-23.8918	2.629	23.6468
21	DX	7282.39	753.278	4.88356	1.41369	863.105	3.50488	0.647492	84.7663	1.39336	2.18333	10.1822	-24.0148	4.1135	24.3942
22	DX	8234.19	1134.07	5.23534	1.68512	1173.31	5.17556	0.877747	129.837	1.01155	1.91983	9.0368	-24.1078	2.4195	26.0829
23	DX	5958.66	1191.03	5.32127	1.87402	1333.02	6.88923	1.69073	149.774	0.772404	1.10841	8.90024	-23.3318	0.5785	25.7049
24	DX	6486.59	872.729	4.50779	1.31972	1037.84	4.19197	0.555273	96.1544	1.07534	2.37671	10.7935	-23.1578	2.3995	25.6973
25	DX	6515.51	887.557	4.36858	1.66981	781.945	4.25431	0.638839	106.488	1.02686	2.61382	7.34303	-23.3628	0.6265	24.6691
